# Supplementary material for: Midbrain Gene Screening Identifies a New Mesoaccumbal Glutamatergic Pathway and a Marker for Dopamine Cells Neuroprotected in Parkinson’s Disease
Source: PubMed Central journal article supplement (PMC5071886; doi:10.1038/srep35203), 2016-10-20
Supplement: srep35203-s1.pdf [file srep35203-s1.pdf]

# **Midbrain Gene Screening Identifies a New Mesoaccumbal Glutamatergic Pathway and a Marker for Dopamine Cells Neuroprotected in Parkinson's Disease**

Thomas Viereckel<sup>1,2</sup>, Sylvie Dumas<sup>3</sup>, Casey J.A. Smith-Anttila<sup>1,4</sup>, Bianca Vclek<sup>1</sup>, Zisis Bimpisidis<sup>1</sup>, Malin C. Lagerström<sup>2</sup>, Åsa Konradsson-Geuken<sup>1</sup>, Åsa Wallén-Mackenzie<sup>1\*</sup>

1. Department of Organismal Biology/Comparative Physiology, Uppsala University, S-752 36 Uppsala, Sweden

2. Department of Neuroscience, Uppsala University, S-751 24 Uppsala, Sweden.

3. Oramacell, 75006 Paris, France.

4. Department of Anatomy and Neuroscience, University of Melbourne, Victoria 3010, Australia

\* Corresponding author: Professor Åsa Wallén-Mackenzie, Uppsala University, Department of Organismal Biology/Comparative Physiology, Norbyvägen 18A, S-752 36 Uppsala, Sweden.

Telephone: +46-18-471 6419. E-mail: [asa.mackenzie@ebc.uu.se](mailto:asa.mackenzie@ebc.uu.se)

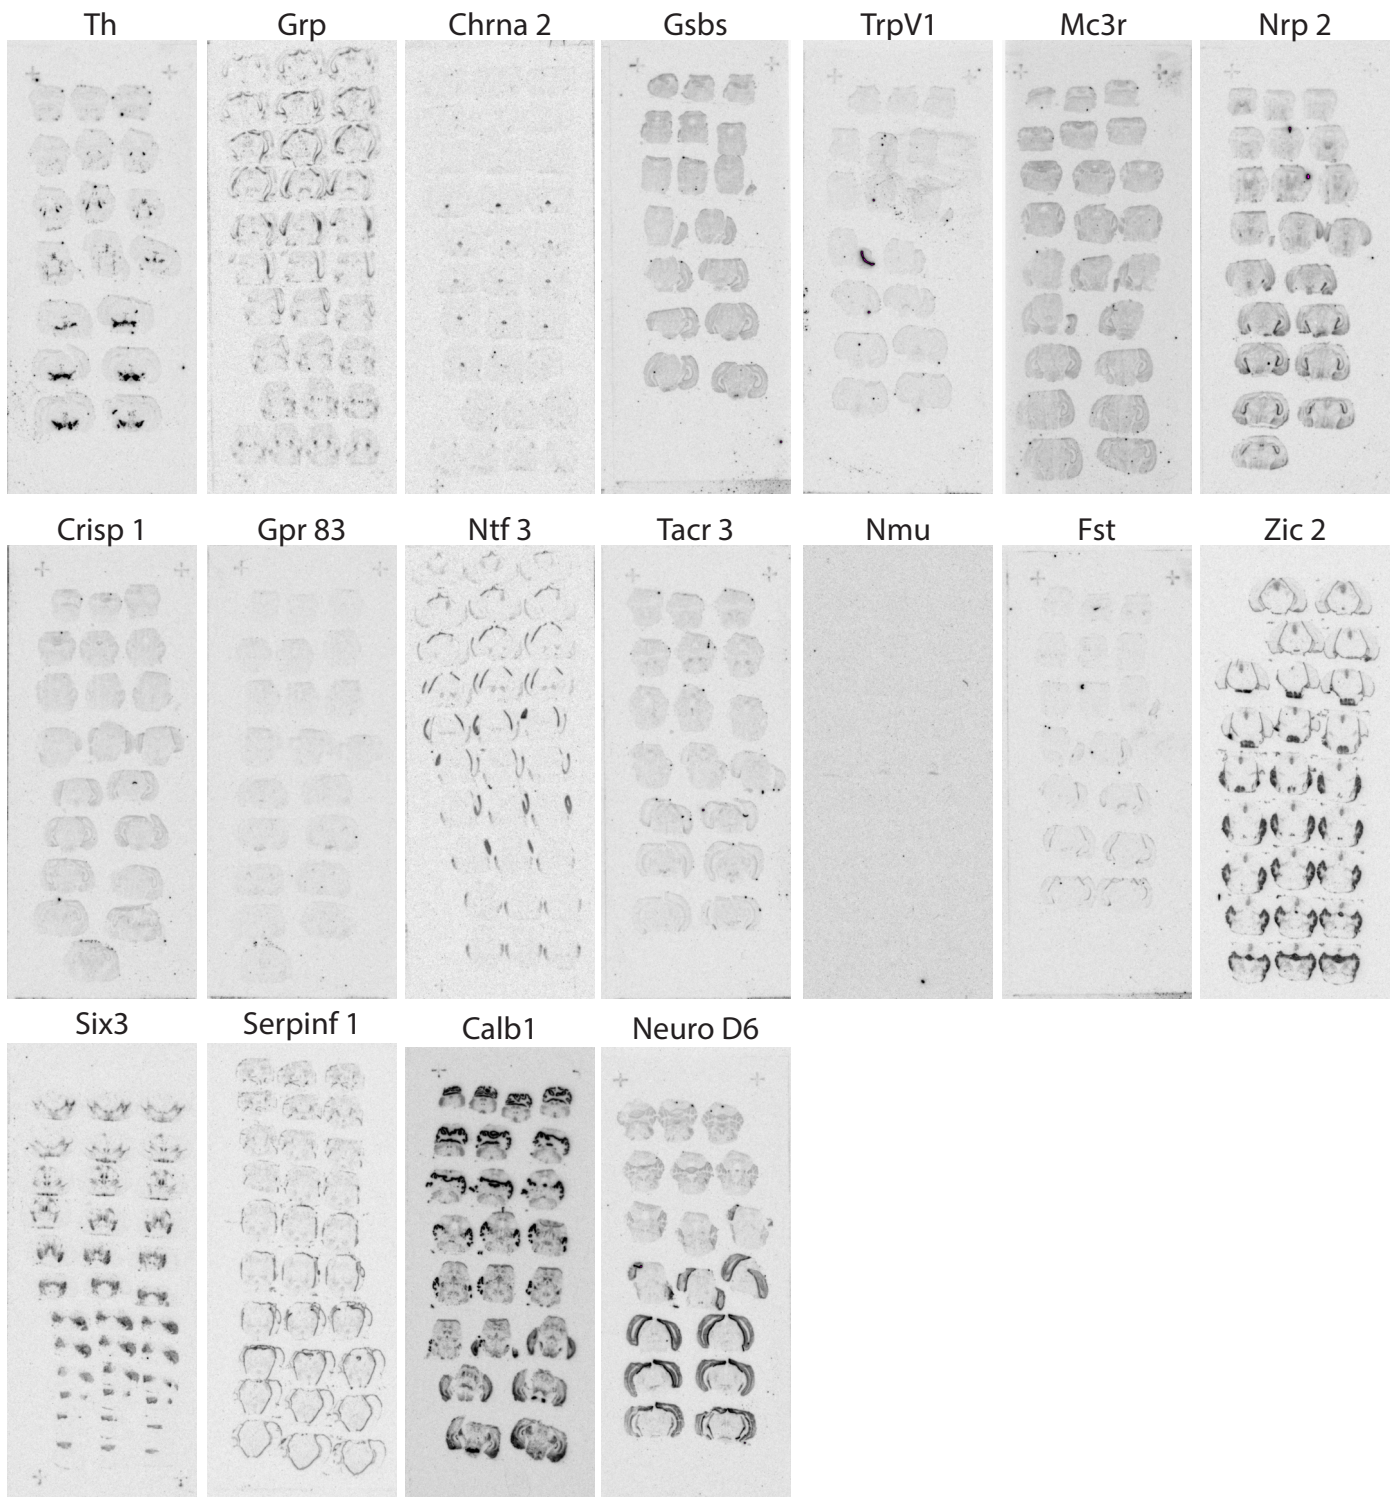

**Supplementary Figure 1:** Whole plate overview of oligo probe in situ hybridization results for each marker depicted in *Figure 1D*.

Supplementary Table 2: GO categories for top 50 genes

**Summary**

Gene ontology term analysis by GO-Molecular Function revealed 16 of the candidate genes to be involved in transmembrane signaling transducer activity ( $p = 0.00016$ ), 6 of which had G-protein coupled peptide receptor activity ( $p = 3.45e-05$ ). When categorizing by GO-Biological Process, 17 genes were enriched in the category behavior ( $p = 1.53e-10$ ) and 8 in axon guidance ( $p = 4.88e-06$ ). A total of 15 genes were enriched in intrinsic component of the plasma membrane ( $p = 3.96e-05$ ) and 14 in the synapse ( $p = 4.62e-08$ ) by GO-Cellular Component.

Classification with Princeton Generic Gene GO Term Finder (Princeton University, USA; <http://go.princeton.edu/cgi-bin/GOTermFinder>) with mus musculus (MG) as annotation background. Three separate queries were carried out for categorization according to molecular function (GO-MF), biological process (GO-BP) and cellular component (GO-CC).

**Input list**

Zic2, Six3, Serpinf1, Fign, Cdh12, Eph4, Ly96, Fkbp10, Acn4, Fbln1, Tmem90b, Gbx2, Clec1a, Adra1b, Lgi1, Mcc, Fam167a, Gpr52, Sliit2, Csf2rb, Gabrq, Chrb3, Sdc2, Scg2, Fgf10, Kng3, Gch1, Ret, Necab1, C13002120Rik, Kcnk9, Vwa5b1, Oprk1, Cckar, Cbln4, Lmx1a, Gpr98, Avpr1a, Fst, Nmu, Tacr3, Ntf3, Gpr83, Crisp1, Nrp2, Mc3r, Trpv1, Gsbs, Chrna2, Grp

**Molecular function**

| Gene Ontology term                              | Cluster frequency     | Genome frequency           | Corrected P-value | FDR   | false positives | Genes annotated to the term                                                                                         |
|-------------------------------------------------|-----------------------|----------------------------|-------------------|-------|-----------------|---------------------------------------------------------------------------------------------------------------------|
| G-protein coupled peptide receptor activity     | 6 of 50 genes, 12.0%  | 130 of 24183 genes, 0.5%   | 3.45E-05          | 0.00% | 0               | Mc3r, Oprk1, Cckar, Tacr3, Gpr83, Avpr1a                                                                            |
| peptide receptor activity                       | 6 of 50 genes, 12.0%  | 134 of 24183 genes, 0.6%   | 4.13E-05          | 0.00% | 0               | Mc3r, Oprk1, Cckar, Tacr3, Gpr83, Avpr1a                                                                            |
| signaling receptor activity                     | 17 of 50 genes, 34.0% | 2082 of 24183 genes, 8.6%  | 5.63E-05          | 0.00% | 0               | Mc3r, Adra1b, Avpr1a, Nrp2, Eph4, Gabrq, Trpv1, Oprk1, Tacr3, Cckar, Gpr83, Chrna2, Ly96, Gpr98, Gpr52, Ret, Csf2rb |
| receptor activity                               | 17 of 50 genes, 34.0% | 2228 of 24183 genes, 9.2%  | 0.00014           | 0.00% | 0               | Mc3r, Adra1b, Avpr1a, Nrp2, Eph4, Gabrq, Trpv1, Oprk1, Tacr3, Cckar, Gpr83, Chrna2, Ly96, Gpr98, Gpr52, Ret, Csf2rb |
| transmembrane signaling receptor activity       | 16 of 50 genes, 32.0% | 1988 of 24183 genes, 8.2%  | 0.00016           | 0.00% | 0               | Mc3r, Adra1b, Avpr1a, Nrp2, Eph4, Gabrq, Trpv1, Oprk1, Tacr3, Cckar, Gpr83, Chrna2, Gpr98, Gpr52, Ret, Csf2rb       |
| signal transducer activity                      | 17 of 50 genes, 34.0% | 2280 of 24183 genes, 9.4%  | 0.0002            | 0.00% | 0               | Mc3r, Adra1b, Avpr1a, Nrp2, Eph4, Gabrq, Trpv1, Oprk1, Tacr3, Cckar, Gpr83, Chrna2, Ly96, Gpr98, Gpr52, Ret, Csf2rb |
| molecular transducer activity                   | 17 of 50 genes, 34.0% | 2425 of 24183 genes, 10.0% | 0.00047           | 0.00% | 0               | Mc3r, Adra1b, Avpr1a, Nrp2, Eph4, Gabrq, Trpv1, Oprk1, Tacr3, Cckar, Gpr83, Chrna2, Ly96, Gpr98, Gpr52, Ret, Csf2rb |
| ion channel activity                            | 7 of 50 genes, 14.0%  | 375 of 24183 genes, 1.6%   | 0.00141           | 0.00% | 0               | Gabrq, Trpv1, Kcnk9, Kng3, Chmb3, Acn4, Chma2                                                                       |
| extracellular ligand-gated ion channel activity | 4 of 50 genes, 8.0%   | 69 of 24183 genes, 0.3%    | 0.00155           | 0.00% | 0               | Gabrq, Trpv1, Chmb3, Chma2                                                                                          |
| substrate-specific channel activity             | 7 of 50 genes, 14.0%  | 386 of 24183 genes, 1.6%   | 0.0017            | 0.00% | 0               | Gabrq, Trpv1, Kcnk9, Kng3, Chmb3, Acn4, Chma2                                                                       |
| calcium ion binding                             | 8 of 50 genes, 16.0%  | 541 of 24183 genes, 2.2%   | 0.00172           | 0.00% | 0               | Gch1, Necab1, Sliit2, Fkbp10, Fbln1, Gpr98, Cdh12, Ret                                                              |
| chemoattractant activity                        | 3 of 50 genes, 6.0%   | 25 of 24183 genes, 0.1%    | 0.00227           | 0.00% | 0               | Scg2, Ntf3, Fgf10                                                                                                   |
| channel activity                                | 7 of 50 genes, 14.0%  | 409 of 24183 genes, 1.7%   | 0.00246           | 0.00% | 0               | Gabrq, Trpv1, Kcnk9, Kng3, Chmb3, Acn4, Chma2                                                                       |
| passive transmembrane transporter activity      | 7 of 50 genes, 14.0%  | 409 of 24183 genes, 1.7%   | 0.00246           | 0.00% | 0               | Gabrq, Trpv1, Kcnk9, Kng3, Chmb3, Acn4, Chma2                                                                       |
| cation channel activity                         | 6 of 50 genes, 12.0%  | 278 of 24183 genes, 1.1%   | 0.00279           | 0.00% | 0               | Trpv1, Kcnk9, Kng3, Chmb3, Acn4, Chma2                                                                              |
| gated channel activity                          | 6 of 50 genes, 12.0%  | 299 of 24183 genes, 1.2%   | 0.0042            | 0.12% | 0.02            | Gabrq, Trpv1, Kcnk9, Kng3, Chmb3, Chma2                                                                             |

**Biological Process**

| Gene Ontology term                                    | Cluster frequency     | Genome frequency            | Corrected P-value | FDR   | false positives | Genes annotated to the term                                                                                                                                                                                                                                              |
|-------------------------------------------------------|-----------------------|-----------------------------|-------------------|-------|-----------------|--------------------------------------------------------------------------------------------------------------------------------------------------------------------------------------------------------------------------------------------------------------------------|
| behavior                                              | 17 of 50 genes, 34.0% | 794 of 24183 genes, 3.3%    | 1.53E-10          | 0.00% | 0               | Scg2, Mc3r, Ntf3, Fgf10, Adra1b, Six3, Avpr1a, Sliit2, Eph4, Trpv1, Oprk1, Tacr3, Fign, Cckar, Gpr52, Serpinf1, Nmu                                                                                                                                                      |
| regulation of multicellular organismal process        | 22 of 50 genes, 44.0% | 2614 of 24183 genes, 10.8%  | 1.88E-06          | 0.00% | 0               | Mc3r, Ntf3, Fgf10, Adra1b, Six3, Avpr1a, Sliit2, Eph4, Trpv1, Oprk1, Mcc, Tacr3, Sdc2, Fst, Fbln1, Ly96, Serpinf1, Nmu, Tmem90b, Zic2, Ret, Lmx1a                                                                                                                        |
| locomotion                                            | 17 of 50 genes, 34.0% | 1457 of 24183 genes, 6.0%   | 2.07E-06          | 0.00% | 0               | Scg2, Ntf3, Fgf10, Six3, Sliit2, Nrp2, Gbx2, Eph4, Lgi1, Oprk1, Mcc, Cckar, Fbln1, Serpinf1, Zic2, Ret, Lmx1a                                                                                                                                                            |
| axon guidance                                         | 8 of 50 genes, 16.0%  | 193 of 24183 genes, 0.8%    | 4.88E-06          | 0.00% | 0               | Ntf3, Sliit2, Gbx2, Nrp2, Eph4, Lgi1, Zic2, Lmx1a                                                                                                                                                                                                                        |
| neuron projection guidance                            | 8 of 50 genes, 16.0%  | 194 of 24183 genes, 0.8%    | 5.08E-06          | 0.00% | 0               | Ntf3, Sliit2, Gbx2, Nrp2, Eph4, Lgi1, Zic2, Lmx1a                                                                                                                                                                                                                        |
| cell morphogenesis involved in neuron differentiation | 11 of 50 genes, 22.0% | 512 of 24183 genes, 2.1%    | 5.19E-06          | 0.00% | 0               | Ntf3, Cckar, Sliit2, Nrp2, Gbx2, Eph4, Lgi1, Sdc2, Zic2, Ret, Lmx1a                                                                                                                                                                                                      |
| axonogenesis                                          | 10 of 50 genes, 20.0% | 397 of 24183 genes, 1.6%    | 6.19E-06          | 0.00% | 0               | Ntf3, Cckar, Sliit2, Nrp2, Gbx2, Eph4, Lgi1, Zic2, Ret, Lmx1a                                                                                                                                                                                                            |
| neuron projection morphogenesis                       | 11 of 50 genes, 22.0% | 551 of 24183 genes, 2.3%    | 1.10E-05          | 0.00% | 0               | Ntf3, Cckar, Sliit2, Nrp2, Gbx2, Eph4, Lgi1, Sdc2, Zic2, Ret, Lmx1a                                                                                                                                                                                                      |
| axon development                                      | 10 of 50 genes, 20.0% | 423 of 24183 genes, 1.7%    | 1.13E-05          | 0.00% | 0               | Ntf3, Cckar, Sliit2, Nrp2, Gbx2, Eph4, Lgi1, Zic2, Ret, Lmx1a                                                                                                                                                                                                            |
| cell morphogenesis involved in differentiation        | 12 of 50 genes, 24.0% | 741 of 24183 genes, 3.1%    | 2.22E-05          | 0.00% | 0               | Ntf3, Cckar, Sliit2, Nrp2, Gbx2, Eph4, Fbln1, Lgi1, Sdc2, Lmx1a, Zic2, Ret                                                                                                                                                                                               |
| chemotaxis                                            | 10 of 50 genes, 20.0% | 484 of 24183 genes, 2.0%    | 4.01E-05          | 0.00% | 0               | Scg2, Ntf3, Fgf10, Sliit2, Nrp2, Gbx2, Eph4, Lgi1, Zic2, Lmx1a                                                                                                                                                                                                           |
| taxis                                                 | 10 of 50 genes, 20.0% | 486 of 24183 genes, 2.0%    | 4.17E-05          | 0.00% | 0               | Scg2, Ntf3, Fgf10, Sliit2, Nrp2, Gbx2, Eph4, Lgi1, Zic2, Lmx1a                                                                                                                                                                                                           |
| movement of cell or subcellular component             | 16 of 50 genes, 32.0% | 1561 of 24183 genes, 6.5%   | 4.32E-05          | 0.00% | 0               | Scg2, Ntf3, Fgf10, Six3, Sliit2, Nrp2, Gbx2, Eph4, Lgi1, Mcc, Cckar, Fbln1, Serpinf1, Zic2, Ret, Lmx1a                                                                                                                                                                   |
| neuron development                                    | 13 of 50 genes, 26.0% | 994 of 24183 genes, 4.1%    | 6.49E-05          | 0.00% | 0               | Ntf3, Cckar, Sliit2, Nrp2, Gbx2, Eph4, Lgi1, Gpr98, Serpinf1, Sdc2, Lmx1a, Zic2, Ret                                                                                                                                                                                     |
| neuron projection development                         | 12 of 50 genes, 24.0% | 845 of 24183 genes, 3.5%    | 9.33E-05          | 0.00% | 0               | Ntf3, Cckar, Sliit2, Nrp2, Gbx2, Eph4, Lgi1, Serpinf1, Sdc2, Lmx1a, Zic2, Ret                                                                                                                                                                                            |
| neuron differentiation                                | 14 of 50 genes, 28.0% | 1247 of 24183 genes, 5.2%   | 0.00012           | 0.00% | 0               | Ntf3, Cckar, Six3, Sliit2, Nrp2, Gbx2, Eph4, Lgi1, Gpr98, Serpinf1, Sdc2, Lmx1a, Ret, Zic2                                                                                                                                                                               |
| response to chemical                                  | 23 of 50 genes, 46.0% | 3586 of 24183 genes, 14.8%  | 0.00012           | 0.00% | 0               | Gch1, Scg2, Ntf3, Fgf10, Adra1b, Avpr1a, Sliit2, Nrp2, Gbx2, Eph4, Lgi1, Trpv1, Oprk1, Tacr3, Fst, Cckar, Gpr83, Ly96, Gpr98, Csf2rb, Zic2, Ret, Lmx1a                                                                                                                   |
| neurogenesis                                          | 15 of 50 genes, 30.0% | 1474 of 24183 genes, 6.1%   | 0.00014           | 0.00% | 0               | Ntf3, Cckar, Fgf10, Six3, Sliit2, Nrp2, Gbx2, Eph4, Lgi1, Gpr98, Serpinf1, Sdc2, Lmx1a, Ret, Zic2                                                                                                                                                                        |
| regulation of cellular process                        | 39 of 50 genes, 78.0% | 10066 of 24183 genes, 41.6% | 0.00014           | 0.00% | 0               | Mc3r, Ntf3, Adra1b, Avpr1a, Gbx2, Gabrq, Lgi1, Eph4, Oprk1, Tacr3, Chrna2, Fbln1, Gpr52, Grp, Nmu, Lmx1a, Scg2, Gch1, Six3, Fgf10, Sliit2, Nrp2, Trpv1, Mcc, Sdc2, Fign, Fst, Cckar, Gpr83, Ly96, Gpr98, Serpinf1, Csf2rb, Zic2, Tmem90b, Ret                            |
| response to stimulus                                  | 35 of 50 genes, 70.0% | 8242 of 24183 genes, 34.1%  | 0.00019           | 0.00% | 0               | Mc3r, Ntf3, Adra1b, Avpr1a, Gbx2, Gabrq, Lgi1, Eph4, Oprk1, Tacr3, Chrna2, Fbln1, Gpr52, Grp, Nmu, Lmx1a, Scg2, Gch1, Six3, Fgf10, Sliit2, Nrp2, Mcc, Trpv1, Fign, Fst, Cckar, Gpr83, Ly96, Gpr98, Serpinf1, Csf2rb, Zic2, Tmem90b, Ret                                  |
| single organism signaling                             | 29 of 50 genes, 58.0% | 5799 of 24183 genes, 24.0%  | 0.00023           | 0.00% | 0               | Scg2, Mc3r, Ntf3, Fgf10, Adra1b, Six3, Avpr1a, Sliit2, Nrp2, Gabrq, Eph4, Lgi1, Trpv1, Oprk1, Mcc, Tacr3, Fst, Cckar, Gpr83, Chrna2, Fbln1, Gpr98, Ly96, Gpr52, Grp, Nmu, Zic2, Csf2rb, Ret                                                                              |
| signaling                                             | 29 of 50 genes, 58.0% | 5807 of 24183 genes, 24.0%  | 0.00023           | 0.00% | 0               | Scg2, Mc3r, Ntf3, Fgf10, Adra1b, Six3, Avpr1a, Sliit2, Nrp2, Gabrq, Eph4, Lgi1, Trpv1, Oprk1, Mcc, Tacr3, Fst, Cckar, Gpr83, Chrna2, Fbln1, Gpr98, Ly96, Gpr52, Grp, Nmu, Zic2, Csf2rb, Ret                                                                              |
| signal transduction                                   | 28 of 50 genes, 56.0% | 5439 of 24183 genes, 22.5%  | 0.00024           | 0.00% | 0               | Scg2, Mc3r, Ntf3, Fgf10, Adra1b, Six3, Avpr1a, Sliit2, Nrp2, Gabrq, Eph4, Lgi1, Trpv1, Oprk1, Mcc, Tacr3, Fst, Cckar, Gpr83, Chrna2, Fbln1, Gpr98, Ly96, Gpr52, Grp, Nmu, Zic2, Csf2rb, Ret                                                                              |
| regulation of signaling                               | 19 of 50 genes, 38.0% | 2557 of 24183 genes, 10.6%  | 0.00027           | 0.00% | 0               | Scg2, Ntf3, Fgf10, Adra1b, Six3, Avpr1a, Sliit2, Eph4, Lgi1, Oprk1, Mcc, Fst, Cckar, Fbln1, Ly96, Gpr98, Nmu, Zic2, Ret                                                                                                                                                  |
| cell migration                                        | 13 of 50 genes, 26.0% | 1128 of 24183 genes, 4.7%   | 0.00027           | 0.00% | 0               | Scg2, Ntf3, Cckar, Fgf10, Six3, Sliit2, Nrp2, Gbx2, Eph4, Fbln1, Mcc, Serpinf1, Ret                                                                                                                                                                                      |
| regulation of cell communication                      | 19 of 50 genes, 38.0% | 2598 of 24183 genes, 10.7%  | 0.00035           | 0.00% | 0               | Scg2, Ntf3, Fgf10, Adra1b, Six3, Avpr1a, Sliit2, Eph4, Lgi1, Oprk1, Mcc, Fst, Cckar, Fbln1, Ly96, Gpr98, Nmu, Zic2, Ret                                                                                                                                                  |
| cell communication                                    | 29 of 50 genes, 58.0% | 5910 of 24183 genes, 24.4%  | 0.00035           | 0.00% | 0               | Scg2, Mc3r, Ntf3, Fgf10, Adra1b, Six3, Avpr1a, Sliit2, Nrp2, Gabrq, Eph4, Lgi1, Trpv1, Oprk1, Mcc, Tacr3, Fst, Cckar, Gpr83, Chrna2, Fbln1, Gpr98, Ly96, Gpr52, Grp, Nmu, Zic2, Csf2rb, Ret                                                                              |
| cell projection morphogenesis                         | 11 of 50 genes, 22.0% | 780 of 24183 genes, 3.2%    | 0.00036           | 0.00% | 0               | Ntf3, Cckar, Sliit2, Nrp2, Gbx2, Eph4, Lgi1, Sdc2, Zic2, Ret, Lmx1a                                                                                                                                                                                                      |
| generation of neurons                                 | 14 of 50 genes, 28.0% | 1384 of 24183 genes, 5.7%   | 0.00043           | 0.00% | 0               | Ntf3, Cckar, Six3, Sliit2, Nrp2, Gbx2, Eph4, Lgi1, Gpr98, Serpinf1, Sdc2, Lmx1a, Ret, Zic2                                                                                                                                                                               |
| cell part morphogenesis                               | 11 of 50 genes, 22.0% | 801 of 24183 genes, 3.3%    | 0.00048           | 0.00% | 0               | Ntf3, Cckar, Sliit2, Nrp2, Gbx2, Eph4, Lgi1, Sdc2, Zic2, Ret, Lmx1a                                                                                                                                                                                                      |
| biological regulation                                 | 40 of 50 genes, 80.0% | 11078 of 24183 genes, 45.8% | 0.00063           | 0.00% | 0               | Mc3r, Ntf3, Adra1b, Avpr1a, Gbx2, Gabrq, Lgi1, Eph4, Oprk1, Kng3, Tacr3, Necab1, Chrna2, Fbln1, Gpr52, Gsbs, Grp, Nmu, Lmx1a, Scg2, Gch1, Six3, Fgf10, Sliit2, Nrp2, Trpv1, Mcc, Sdc2, Fign, Fst, Cckar, Gpr83, Ly96, Kcnk9, Gpr98, Serpinf1, Csf2rb, Zic2, Tmem90b, Ret |
| regulation of biological process                      | 39 of 50 genes, 78.0% | 10571 of 24183 genes, 43.7% | 0.00067           | 0.00% | 0               | Mc3r, Ntf3, Adra1b, Avpr1a, Gbx2, Gabrq, Lgi1, Eph4, Oprk1, Kng3, Tacr3, Necab1, Chrna2, Fbln1, Gpr52, Gsbs, Grp, Nmu, Lmx1a, Scg2, Gch1, Six3, Fgf10, Sliit2, Nrp2, Trpv1, Mcc, Sdc2, Fign, Fst, Cckar, Gpr83, Ly96, Gpr98, Serpinf1, Csf2rb, Zic2, Tmem90b, Ret        |
| cell motility                                         | 13 of 50 genes, 26.0% | 1229 of 24183 genes, 5.1%   | 0.00073           | 0.00% | 0               | Scg2, Ntf3, Cckar, Fgf10, Six3, Sliit2, Nrp2, Gbx2, Eph4, Fbln1, Mcc, Serpinf1, Ret                                                                                                                                                                                      |
| localization of cell                                  | 13 of 50 genes, 26.0% | 1229 of 24183 genes, 5.1%   | 0.00073           | 0.00% | 0               | Scg2, Ntf3, Cckar, Fgf10, Six3, Sliit2, Nrp2, Gbx2, Eph4, Fbln1, Mcc, Serpinf1, Ret                                                                                                                                                                                      |
| response to external stimulus                         | 16 of 50 genes, 32.0% | 1927 of 24183 genes, 8.0%   | 0.00076           | 0.00% | 0               | Scg2, Ntf3, Fgf10, Sliit2, Nrp2, Gbx2, Eph4, Lgi1, Trpv1, Oprk1, Cckar, Ly96, Gpr98, Serpinf1, Zic2, Lmx1a                                                                                                                                                               |

|                                                         |                       |                            |         |       |      |                                                                                                                                                                                                |
|---------------------------------------------------------|-----------------------|----------------------------|---------|-------|------|------------------------------------------------------------------------------------------------------------------------------------------------------------------------------------------------|
| nervous system development                              | 16 of 50 genes, 32.0% | 1958 of 24183 genes, 8.1%  | 0.00094 | 0.00% | 0    | Nf3, Fgf10, Six3, Slit2, Nrp2, Gbx2, Eph4, Lgi1, Sdc2, Cckar, Gpr98, Serpinf1, Tmem90b, Zic2, Ret, Lmx1a                                                                                       |
| cell projection organization                            | 13 of 50 genes, 26.0% | 1258 of 24183 genes, 5.2%  | 0.00095 | 0.00% | 0    | Nf3, Cckar, Slit2, Nrp2, Gbx2, Eph4, Lgi1, Gpr98, Serpinf1, Sdc2, Lmx1a, Zic2, Ret                                                                                                             |
| regulation of response to stimulus                      | 20 of 50 genes, 40.0% | 3085 of 24183 genes, 12.8% | 0.00106 | 0.00% | 0    | Gch1, Scg2, Mc3r, Nf3, Fgf10, Adra1b, Six3, Slit2, Eph4, Oprk1, Mcc, Tacr3, Fign, Fat, Fbn1, Ly96, Gpr98, Serpinf1, Zic2, Ret                                                                  |
| positive regulation of multicellular organismal process | 14 of 50 genes, 28.0% | 1496 of 24183 genes, 6.2%  | 0.00109 | 0.00% | 0    | Fat, Nf3, Fgf10, Adra1b, Avpr1a, Eph4, Trpv1, Ly96, Serpinf1, Tacr3, Nmu, Zic2, Tmem90b, Ret                                                                                                   |
| digestive system process                                | 5 of 50 genes, 10.0%  | 92 of 24183 genes, 0.4%    | 0.00112 | 0.00% | 0    | Trpv1, Oprk1, Cckar, Fgf10, Nmu                                                                                                                                                                |
| localization                                            | 26 of 50 genes, 52.0% | 5192 of 24183 genes, 21.5% | 0.00169 | 0.00% | 0    | Scg2, Chmb3, Nf3, Fgf10, Six3, Avpr1a, Slit2, Nrp2, Gbx2, Gabrg3, Eph4, Trpv1, Oprk1, Kng3, Mcc, Cckar, Accn4, Chma2, Fbn1, Gpr98, Cbln4, Kcnk9, Serpinf1, Nmu, Tmem90b, Ret                   |
| cell development                                        | 16 of 50 genes, 32.0% | 2059 of 24183 genes, 8.5%  | 0.00183 | 0.00% | 0    | Nf3, Six3, Slit2, Nrp2, Gbx2, Eph4, Lgi1, Trpv1, Sdc2, Cckar, Fbn1, Gpr98, Serpinf1, Zic2, Ret, Lmx1a                                                                                          |
| central nervous system development                      | 10 of 50 genes, 20.0% | 737 of 24183 genes, 3.0%   | 0.00188 | 0.00% | 0    | Nf3, Cckar, Fgf10, Six3, Slit2, Nrp2, Gbx2, Eph4, Zic2, Lmx1a                                                                                                                                  |
| autonomic nervous system development                    | 4 of 50 genes, 8.0%   | 45 of 24183 genes, 0.2%    | 0.00192 | 0.00% | 0    | Nrp2, Gbx2, Nf3, Ret                                                                                                                                                                           |
| cellular response to stimulus                           | 30 of 50 genes, 60.0% | 6845 of 24183 genes, 28.3% | 0.00241 | 0.04% | 0.02 | Gch1, Scg2, Mc3r, Nf3, Fgf10, Adra1b, Six3, Avpr1a, Slit2, Nrp2, Gabrg3, Eph4, Trpv1, Oprk1, Mcc, Tacr3, Fign, Fat, Cckar, Gpr98, Chma2, Fbn1, Gpr98, Ly96, Gpr52, Gpr, Nmu, Zic2, Csf2rb, Ret |
| induction of positive chemotaxis                        | 3 of 50 genes, 6.0%   | 14 of 24183 genes, 0.1%    | 0.00253 | 0.04% | 0.02 | Scg2, Nf3, Fgf10                                                                                                                                                                               |
| cell morphogenesis                                      | 12 of 50 genes, 24.0% | 1181 of 24183 genes, 4.9%  | 0.0032  | 0.04% | 0.02 | Nf3, Cckar, Slit2, Nrp2, Gbx2, Eph4, Fbn1, Lgi1, Sdc2, Lmx1a, Zic2, Ret                                                                                                                        |
| positive regulation of biological process               | 25 of 50 genes, 50.0% | 5003 of 24183 genes, 20.7% | 0.0033  | 0.04% | 0.02 | Gch1, Scg2, Mc3r, Nf3, Fgf10, Adra1b, Six3, Avpr1a, Slit2, Gbx2, Lgi1, Eph4, Trpv1, Oprk1, Tacr3, Fat, Cckar, Fbn1, Gpr98, Ly96, Serpinf1, Nmu, Tmem90b, Zic2, Ret                             |
| ameboidal-type cell migration                           | 7 of 50 genes, 14.0%  | 320 of 24183 genes, 1.3%   | 0.00347 | 0.04% | 0.02 | Nrp2, Gbx2, Mcc, Serpinf1, Fgf10, Ret, Slit2                                                                                                                                                   |
| digestion                                               | 5 of 50 genes, 10.0%  | 117 of 24183 genes, 0.5%   | 0.00368 | 0.04% | 0.02 | Trpv1, Oprk1, Cckar, Fgf10, Nmu                                                                                                                                                                |
| regulation of system process                            | 8 of 50 genes, 16.0%  | 463 of 24183 genes, 1.9%   | 0.00384 | 0.04% | 0.02 | Mc3r, Fgf10, Adra1b, Avpr1a, Oprk1, Trpv1, Tacr3, Nmu                                                                                                                                          |
| feeding behavior                                        | 5 of 50 genes, 10.0%  | 120 of 24183 genes, 0.5%   | 0.00417 | 0.04% | 0.02 | Mc3r, Oprk1, Cckar, Tacr3, Nmu                                                                                                                                                                 |
| forebrain development                                   | 7 of 50 genes, 14.0%  | 338 of 24183 genes, 1.4%   | 0.00497 | 0.04% | 0.02 | Nrp2, Gbx2, Cckar, Fgf10, Six3, Lmx1a, Slit2                                                                                                                                                   |
| gastric acid secretion                                  | 3 of 50 genes, 6.0%   | 18 of 24183 genes, 0.1%    | 0.00565 | 0.04% | 0.02 | Trpv1, Cckar, Nmu                                                                                                                                                                              |
| negative regulation of cell differentiation             | 9 of 50 genes, 18.0%  | 652 of 24183 genes, 2.7%   | 0.00566 | 0.04% | 0.02 | Fat, Fgf10, Six3, Slit2, Eph4, Fbn1, Gpr98, Trpv1, Lmx1a                                                                                                                                       |
| cellular component morphogenesis                        | 12 of 50 genes, 24.0% | 1257 of 24183 genes, 5.2%  | 0.00607 | 0.04% | 0.02 | Nf3, Cckar, Slit2, Nrp2, Gbx2, Eph4, Fbn1, Lgi1, Sdc2, Lmx1a, Zic2, Ret                                                                                                                        |
| tissue morphogenesis                                    | 9 of 50 genes, 18.0%  | 660 of 24183 genes, 2.7%   | 0.00624 | 0.04% | 0.02 | Fat, Fgf10, Six3, Slit2, Gbx2, Nrp2, Eph4, Zic2, Ret                                                                                                                                           |
| anatomical structure morphogenesis                      | 17 of 50 genes, 34.0% | 2550 of 24183 genes, 10.5% | 0.00644 | 0.03% | 0.02 | Scg2, Nf3, Fgf10, Six3, Slit2, Nrp2, Gbx2, Eph4, Lgi1, Sdc2, Fat, Cckar, Fbn1, Serpinf1, Zic2, Ret, Lmx1a                                                                                      |
| locomotory behavior                                     | 6 of 50 genes, 12.0%  | 230 of 24183 genes, 1.0%   | 0.00661 | 0.03% | 0.02 | Eph4, Mc3r, Oprk1, Fign, Gpr52, Adra1b                                                                                                                                                         |
| negative regulation of developmental process            | 10 of 50 genes, 20.0% | 863 of 24183 genes, 3.6%   | 0.00761 | 0.03% | 0.02 | Fat, Fgf10, Six3, Slit2, Eph4, Fbn1, Gpr98, Trpv1, Serpinf1, Lmx1a                                                                                                                             |
| diencephalon development                                | 4 of 50 genes, 8.0%   | 65 of 24183 genes, 0.3%    | 0.00849 | 0.03% | 0.02 | Nrp2, Gbx2, Fgf10, Six3                                                                                                                                                                        |

### Cellular Component

| Gene Ontology term                     | Cluster frequency     | Genome frequency           | Corrected P-value | FDR   | false positives | Genes annotated to the term                                                                                                                                                 |
|----------------------------------------|-----------------------|----------------------------|-------------------|-------|-----------------|-----------------------------------------------------------------------------------------------------------------------------------------------------------------------------|
| synapse                                | 14 of 50 genes, 28.0% | 792 of 24183 genes, 3.3%   | 4.62E-08          | 0.00% | 0               | Chmb3, Cckar, Chma2, Eph4, Lgi1, Gabrg, Trpv1, Gpr98, Cbln4, Kcnk9, Oprk1, Sdc2, Nmu, Tmem90b                                                                               |
| intrinsic component of plasma membrane | 15 of 50 genes, 30.0% | 1577 of 24183 genes, 6.5%  | 3.96E-05          | 0.00% | 0               | Chmb3, Cckar, Gpr83, Adra1b, Chma2, Avpr1a, Eph4, Gabrg, Trpv1, Oprk1, Kcnk9, Ly96, Kng3, Tmem90b, Ret                                                                      |
| neuron part                            | 14 of 50 genes, 28.0% | 1376 of 24183 genes, 5.7%  | 4.78E-05          | 0.00% | 0               | Chmb3, Cckar, Nrp2, Eph4, Trpv1, Gpr98, Kcnk9, Oprk1, Serpinf1, Tacr3, Sdc2, Nmu, Tmem90b, Ret                                                                              |
| synapse part                           | 9 of 50 genes, 18.0%  | 593 of 24183 genes, 2.5%   | 0.00031           | 0.00% | 0               | Chmb3, Cckar, Chma2, Eph4, Gabrg, Kcnk9, Trpv1, Tmem90b, Nmu                                                                                                                |
| plasma membrane                        | 24 of 50 genes, 48.0% | 4662 of 24183 genes, 19.3% | 0.00041           | 0.00% | 0               | Mc3r, Chmb3, Fgf10, Adra1b, Avpr1a, Slit2, Nrp2, Gabrg, Eph4, Trpv1, Oprk1, Kng3, Mcc, Cdh12, Tacr3, Cckar, Gpr83, Chma2, Ly96, Kcnk9, Gpr98, Gpr52, Tmem90b, Ret           |
| postsynaptic membrane                  | 6 of 50 genes, 12.0%  | 214 of 24183 genes, 0.9%   | 0.00051           | 0.00% | 0               | Gabrg, Eph4, Trpv1, Chmb3, Chma2, Tmem90b                                                                                                                                   |
| cell periphery                         | 24 of 50 genes, 48.0% | 4774 of 24183 genes, 19.7% | 0.00064           | 0.00% | 0               | Mc3r, Chmb3, Fgf10, Adra1b, Avpr1a, Slit2, Nrp2, Gabrg, Eph4, Trpv1, Oprk1, Kng3, Mcc, Cdh12, Tacr3, Cckar, Gpr83, Chma2, Ly96, Kcnk9, Gpr98, Gpr52, Tmem90b, Ret           |
| integral component of plasma membrane  | 13 of 50 genes, 26.0% | 1520 of 24183 genes, 6.3%  | 0.0009            | 0.00% | 0               | Chmb3, Cckar, Gpr83, Adra1b, Chma2, Avpr1a, Eph4, Gabrg, Oprk1, Kng3, Kcnk9, Tmem90b, Ret                                                                                   |
| plasma membrane part                   | 17 of 50 genes, 34.0% | 2607 of 24183 genes, 10.8% | 0.00102           | 0.00% | 0               | Chmb3, Adra1b, Avpr1a, Eph4, Gabrg, Trpv1, Oprk1, Kng3, Tacr3, Cckar, Gpr83, Chma2, Ly96, Kcnk9, Gpr98, Ret                                                                 |
| neuron projection                      | 11 of 50 genes, 22.0% | 1084 of 24183 genes, 4.5%  | 0.00105           | 0.00% | 0               | Chmb3, Cckar, Nrp2, Eph4, Trpv1, Oprk1, Serpinf1, Tacr3, Tmem90b, Ret, Nmu                                                                                                  |
| synaptic membrane                      | 6 of 50 genes, 12.0%  | 264 of 24183 genes, 1.1%   | 0.00171           | 0.00% | 0               | Gabrg, Eph4, Trpv1, Chmb3, Chma2, Tmem90b                                                                                                                                   |
| integral component of membrane         | 25 of 50 genes, 50.0% | 5625 of 24183 genes, 23.3% | 0.00341           | 0.00% | 0               | Mc3r, Chmb3, Clecta, Adra1b, Avpr1a, Nrp2, Gabrg, Eph4, Trpv1, Oprk1, Kng3, Cdh12, Tacr3, Sdc2, Cckar, Accn4, Gpr83, Chma2, Gpr98, Ly96, Kcnk9, Gpr52, Tmem90b, Csf2rb, Ret |
| receptor complex                       | 6 of 50 genes, 12.0%  | 307 of 24183 genes, 1.3%   | 0.00399           | 0.00% | 0               | Gabrg, Gpr98, Chmb3, Ly96, Chma2, Ret                                                                                                                                       |
| intrinsic component of membrane        | 25 of 50 genes, 50.0% | 5757 of 24183 genes, 23.8% | 0.00516           | 0.00% | 0               | Mc3r, Chmb3, Clecta, Adra1b, Avpr1a, Nrp2, Gabrg, Eph4, Trpv1, Oprk1, Kng3, Cdh12, Tacr3, Sdc2, Cckar, Accn4, Gpr83, Chma2, Gpr98, Ly96, Kcnk9, Gpr52, Tmem90b, Csf2rb, Ret |
| cell body                              | 8 of 50 genes, 16.0%  | 653 of 24183 genes, 2.7%   | 0.00539           | 0.00% | 0               | Eph4, Oprk1, Trpv1, Serpinf1, Tacr3, Sdc2, Tmem90b, Ret                                                                                                                     |
| axon                                   | 7 of 50 genes, 14.0%  | 487 of 24183 genes, 2.0%   | 0.00613           | 0.00% | 0               | Nrp2, Eph4, Oprk1, Cckar, Serpinf1, Nmu, Ret                                                                                                                                |

Supplementary Table 3: Probe sequences for *in situ* hybridization

| Mouse probes |             |                |           |               |          |              |                |            |
|--------------|-------------|----------------|-----------|---------------|----------|--------------|----------------|------------|
| mRNA         | oligo name  | NM             | oligo seq | riboprobe seq | mRNA     | oligo name   | NM             | oligo seq  |
| Calb1        | Calb1-AS1   | NM_009788.4    | 1508-1541 | 79-870        | Crisp1   | Crisp1-AS1   | NM_009638.3    | 598-630    |
|              | Calb1-AS2   |                | 1362-1395 |               | Gsbs     | Ppp1r17-AS1  | NM_011153.3    | 933-966    |
|              | Calb1-AS3   |                | 860-893   |               |          | Ppp1r17-AS2  |                | 159-192    |
| Lpl          | Lpl-AS1     | NM_008509.2    | 651-684   | 680-1460      |          | Ppp1r17-AS3  |                | 1602-1635  |
|              | Lpl-AS2     |                | 1433-1466 |               | Mc3r     | Mc3r-AS1     | NM_008561.3    | 17-50      |
|              | Lpl-AS3     |                | 2954-2987 |               |          | Mc3r-AS2     |                | 108-141    |
| Fst          | Fst-AS1     | NM_001301373.1 | 1586-1619 | 460-1221      |          | Mc3r-AS3     |                | 1963-1996  |
|              | Fst-AS2     |                | 402-435   |               | Gpr83    | Gpr83-AS1    | NM_010287.3    | 103-136    |
|              | Fst-AS3     |                | 1875-1908 |               |          | Gpr83-AS2    |                | 1496-1529  |
| NeuroD6      | NeuroD6-AS1 | NM_009717.2    | 99-132    | 635-1419      |          | Nrp2-AS1     | NM_001077403.1 | 1773-1806  |
|              | NeuroD6-AS2 |                | 933-966   |               | Nrp2     | Nrp2-AS2     |                | 1026-1059  |
|              | NeuroD6-AS3 |                | 1256-1288 |               |          | Nrp2-AS3     |                | 2349-2382  |
| Tacr3        | Tacr3-AS1   | NM_021382.6    | 675-707   | 621-1427      |          | Chrma2-AS1   | NM_144803.2    | 2316-2349  |
|              | Tacr3-AS2   |                | 1052-1085 |               | Chrma2   | Chrma2-AS2   |                | 3341-3375  |
|              | Tacr3-AS3   |                |           |               |          | 137-169      |                | Chrma2-AS3 |
| Grp          | Grp-AS1     | NM_175012.3    | 86-119    | 134-858       |          | Nmu-AS1      | NM_019515.1    | 326-359    |
|              | Grp-AS2     |                | 434-467   |               | Nmu      | Nmu-AS2      |                | 20-53      |
|              | Grp-AS3     |                | 217-250   |               |          | Nmu-AS3      |                | 471-504    |
| Ntf3         | Ntf3-AS1    | NM_001164034.1 | 661-694   | 538-1295      |          | Serpinf1-AS1 | NM_011340.3    | 318-351    |
|              | Ntf3-AS2    |                | 707-740   |               | Serpinf1 | Serpinf1-AS2 |                | 1269-1302  |
|              | Ntf3-AS3    |                | 826-859   |               |          | Serpinf1-AS3 |                | 691-724    |
| Six3         | six3-AS1    | NM_011381.4    | 1400-1433 | 220-617       |          | Zic2-AS1     | NM_009574.3    | 1835-1868  |
|              | six3-AS2    |                | 2521-2556 |               | Zic2     | Zic2-AS2     |                | 159-193    |
|              | six3-AS3    |                | 389-422   |               |          | Zic2-AS3     |                | 2291-2324  |
| Trpv1        | trpv1-AS1   | NM_001001445.2 | 1441-1474 | 426-1239      |          |              |                |            |
|              | trpv1-AS2   |                | 2643-2676 |               |          |              |                |            |
|              | trpv1-AS3   |                | 2102-2135 |               |          |              |                |            |
| Th           | th-AS1      | NM_009377.1    | 774-807   | 456-1453      |          |              |                |            |
|              | th-AS2      |                | 272-305   |               |          |              |                |            |
|              | th-AS3      |                | 1621-1655 |               |          |              |                |            |
| tdTomato     |             |                |           |               |          |              | 84-653         |            |
| slc17a6      |             | NM_080853.3    |           |               |          |              |                | 2315-3244  |
| slc32a1      |             | NM_009508.2    |           |               |          |              |                | 649-1488   |
| slc6a3       |             | NM_012694.2    |           |               |          |              |                | 1015-1938  |
| Girk2        |             | NM_010606.2    |           |               |          |              |                | 275-1028   |
| Calb1        |             | NM_007586.1    |           |               |          |              |                | 80-809     |

Supplementary Table 4: Summary of mRNA expression pattern in the ventral midbrain of P3 mice

| <b>P3</b> | <b>VTA</b> | <b>SNc</b> | <b>SNr</b> |
|-----------|------------|------------|------------|
| Th        | +          | +          | -          |
| Grp       | +          | -          | -          |
| Chrna2    | -          | -          | -          |
| Gsbs      | -          | -          | -          |
| TrpV1     | +          | -          | -          |
| Mc3r      | -          | -          | -          |
| Nrp2      | +          | -          | -          |
| Chrisp1   | -          | -          | -          |
| Gpr83     | -          | -          | -          |
| Ntf3      | +          | -          | -          |
| Tacr3     | +          | -          | -          |
| Nmu       | -          | -          | -          |
| Fst       | +          | -          | -          |
| Zic2      | -          | -          | -          |
| Six3      | -          | +          | +          |
| Serpinf1  | -          | -          | -          |
| Calb1     | +          | -          | -          |
| NeuroD6   | +          | -          | -          |

## Supplementary Table 5: Quantification of co-expression in P3 and adult mice

### Quantification of Tomato and TrpV1, Th or Vglut2 co-expression in P3 mice

| TrpV1<br>area | absolute cell counts |            |              | % coexpressing |          | Tomato only (%) | TrpV1 only (%) |
|---------------|----------------------|------------|--------------|----------------|----------|-----------------|----------------|
|               | Tomato only          | TrpV1 only | coexpressing | of tomato      | of TrpV1 |                 |                |
| szPBP         | 10                   | 0          | 5            | 33             | 100      | 67              | 0              |
| rmVTA         | 28.5                 | 12         | 15.5         | 35             | 58       | 42              | 65             |
| rmVTA         | 33                   | 6          | 19           | 37             | 76       | 24              | 63             |
| RLI           | 31                   | 9          | 17           | 36             | 67       | 33              | 64             |
| RLI           | 32                   | 8          | 18           | 36             | 71       | 29              | 64             |
| PBP           | 32                   | 8          | 18           | 36             | 71       | 29              | 64             |
| PBP           | 32                   | 8          | 18           | 36             | 71       | 29              | 64             |
| IFC PN        | 32                   | 8          | 18           | 36             | 71       | 29              | 64             |
| IFC PN        | 32                   | 8          | 18           | 36             | 71       | 29              | 64             |

| Th<br>Area | absolute cell counts |         |              | % coexpressing |       | Tomato only (%) | Th only (%) |
|------------|----------------------|---------|--------------|----------------|-------|-----------------|-------------|
|            | Tomato only          | Th only | coexpressing | of tomato      | of Th |                 |             |
| PBP        | 12                   | 974     | 11           | 48             | 1     | 52              | 99          |
| PN/PIF     | 25                   | 352     | 100          | 80             | 22    | 20              | 78          |
| RLi        | 63                   | 21      | 4            | 6              | 16    | 94              | 84          |
| rmVTA      | 83                   | 34      | 6            | 7              | 15    | 93              | 85          |
| szPBP      | 22                   | 30      | 0            | 0              | 0     | 100             | 100         |

| Vglut2<br>Area | absolute cell counts |             |              | % coexpressing |           | Tomato only (%) | Vglut2 only (%) |
|----------------|----------------------|-------------|--------------|----------------|-----------|-----------------|-----------------|
|                | Tomato only          | Vglut2 only | coexpressing | of tomato      | of Vglut2 |                 |                 |
| PBP            | 23                   | 93          | 10           | 30             | 10        | 70              | 90              |
| PN/PIF         | 101                  | 16          | 9            | 8              | 36        | 92              | 64              |
| RLi            | 11                   | 103         | 50           | 82             | 33        | 18              | 67              |
| rmVTA          | 13                   | 88          | 29           | 69             | 25        | 31              | 75              |
| szPBP          | 2                    | 24          | 11           | 85             | 31        | 15              | 69              |

### Quantification of Tomato and Th, vglut2, viaat or Dat co-expression in adult mice

| Dat<br>animal | area   | section | absolute cell counts |          |              | % coexpressing |        |
|---------------|--------|---------|----------------------|----------|--------------|----------------|--------|
|               |        |         | Tomato only          | Dat only | coexpressing | of tomato      | of Dat |
| 35402         | IF     | S139    | 14                   | 10       | 5            | 26.32          | 33.33  |
| 35402         | IF     | S151    | 15                   | 9        | 6            | 28.57          | 40.00  |
| 47367         | IF     | S102    | 13                   | 11       | 7            | 35.00          | 38.89  |
| 47367         | IF     | S114    | 10                   | 5        | 3            | 23.08          | 37.50  |
| 47319         | IF     | S111    | 13                   | 10       | 7            | 35.00          | 41.18  |
| 35402         | PBP    | S139    | 11                   | 242      | 4            | 26.67          | 1.63   |
| 47367         | PBP    | S114    | 17                   | 195      | 7            | 29.17          | 3.47   |
| 47369         | PBP    | S111    | 11                   | 204      | 9            | 45.00          | 4.23   |
| 47369         | PBP    | S123    | 12                   | NC       | 8            | 40.00          | NC     |
| 47369         | szPBP  | S111    | 3                    | 8        | 0            | 0.00           | 0.00   |
| 47369         | szPBP  | S123    | 14                   | 25       | 0            | 0.00           | 0.00   |
| 47367         | szPBP  | S114    | 10                   | 6        | 0            | 0.00           | 0.00   |
| 35402         | szPBP  | S151    | 20                   | 20       | 0            | 0.00           | 0.00   |
| 35402         | PN/PIF | S139    | 16                   | 38       | 7            | 30.43          | 15.56  |
| 47367         | PN/PIF | S114    | 21                   | 82       | 17           | 44.74          | 17.17  |
| 47319         | PN/PIF | S123    | 6                    | 46       | 4            | 40.00          | 8.00   |
| 47367         | rmVTA  | S150    | 113                  | 0        | 0            | 0.00           | 0.00   |
| 35402         | rmVTA  | S170    | 154                  | 0        | 1            | 0.65           | 0.00   |
| 47319         | rmVTA  | S147    | 93                   | 3        | 0            | 0.00           | 0.00   |
| 35402         | SuM    | S170    | 154                  | 0        | 1            | 0.65           | 0.00   |
| 47319         | SuM    | S147    | 170                  | 3        | 2            | 1.16           | 40.00  |
| 47367         | SuM    | S150    | 217                  | 0        | 0            | 0.00           | 0.00   |
| 35402         | RLi    | S139    | 28                   | 0        | 0            | 0.00           | 0.00   |
| 47367         | RLi    | S114    | 31                   | 0        | 0            | 0.00           | 0.00   |

| Th<br>animal | area | section | absolute cell counts |         |              | % coexpressing |       |
|--------------|------|---------|----------------------|---------|--------------|----------------|-------|
|              |      |         | Tomato only          | Th only | coexpressing | of tomato      | of Th |
| 35402        | IF   | S133    | 3                    | 16      | 9            | 75.00          | 36.00 |
| 35402        | IF   | S145    | 4                    | 16      | 11           | 73.33          | 40.74 |
| 47367        | IF   | S97     | 2                    | 32      | 13           | 86.67          | 28.89 |
| 47367        | IF   | S109    | 3                    | 34      | 16           | 84.21          | 32.00 |
| 47319        | IF   | S109    | 6                    | 20      | 14           | 70.00          | 41.18 |
| 35402        | PBP  | S145    | 2                    | 211     | 2            | 50.00          | 0.94  |

|       |        |      |     |     |    |       |       |
|-------|--------|------|-----|-----|----|-------|-------|
| 47367 | PBP    | S109 | 9   | 224 | 23 | 71.88 | 9.31  |
| 47369 | PBP    | S121 | 3   | 198 | 9  | 75.00 | 4.35  |
| 47369 | szPBP  | S121 | 15  | 15  | 0  | 0.00  | 0.00  |
| 47367 | szPBP  | S121 | 15  | 15  | 0  | 0.00  | 0.00  |
| 35402 | szPBP  | S157 | 6   | 12  | 0  | 0.00  | 0.00  |
| 35402 | PN/PIF | S145 | 3   | 70  | 12 | 80.00 | 14.63 |
| 47367 | PN/PIF | S109 | 4   | 77  | 21 | 84.00 | 21.43 |
| 47319 | PN/PIF | S122 | 3   | 34  | 11 | 78.57 | 24.44 |
| 47367 | rmVTA  | S145 | 103 | 6   | 3  | 2.83  | 33.33 |
| 35402 | rmVTA  | S169 | 139 | 7   | 9  | 6.08  | 56.25 |
| 47319 | rmVTA  | S145 | 94  | 16  | 3  | 3.09  | 15.79 |
| 35402 | SuM    | S169 | 143 | 2   | 8  | 5.30  | 80.00 |
| 47319 | SuM    | S145 | 178 | 3   | 3  | 1.66  | 50.00 |
| 47367 | SuM    | S145 | 178 | 1   | 7  | 3.78  | 87.50 |
| 35402 | RLi    | S145 | 17  | 3   | 5  | 22.73 | 62.50 |
| 47367 | RLi    | S109 | 26  | 10  | 14 | 35.00 | 58.33 |

| <b>Vglut2</b> |        |         | absolute cell counts |             |              | % coexpressing |           |
|---------------|--------|---------|----------------------|-------------|--------------|----------------|-----------|
| animal        | area   | section | Tomato only          | Vglut2 only | coexpressing | of tomato      | of Vglut2 |
| 35402         | IF     | S132    | 12                   | 13          | 10           | 45.45          | 43.48     |
| 35402         | IF     | S144    | 10                   | 13          | 10           | 50.00          | 43.48     |
| 47367         | IF     | S104    | 12                   | 18          | 12           | 50.00          | 40.00     |
| 47367         | IF     | S116    | 5                    | 10          | 5            | 50.00          | 33.33     |
| 47319         | IF     | S112    | 5                    | 12          | 6            | 54.55          | 33.33     |
| 47319         | IF     | S124    | 4                    | 11          | 5            | 55.56          | 31.25     |
| 35402         | PBP    | S144    | 10                   | 15          | 4            | 28.57          | 21.05     |
| 47367         | PBP    | S116    | 12                   | 82          | 10           | 45.45          | 10.87     |
| 47369         | PBP    | S112    | 7                    | 54          | 9            | 56.25          | 14.29     |
| 47369         | szPBP  | S124    | 1                    | 7           | 8            | 88.89          | 53.33     |
| 47367         | szPBP  | S116    | 1                    | 15          | 12           | 92.31          | 44.44     |
| 35402         | szPBP  | S156    | 1                    | 11          | 14           | 93.33          | 56.00     |
| 35402         | PN/PIF | S144    | 7                    | 6           | 5            | 41.67          | 45.45     |
| 47367         | PN/PIF | S116    | 19                   | 14          | 12           | 38.71          | 46.15     |
| 47319         | PN/PIF | S116    | 10                   | 8           | 6            | 37.50          | 42.86     |
| 47367         | rmVTA  | S152    | 27                   | 150         | 75           | 73.53          | 33.33     |
| 35402         | rmVTA  | S168    | 43                   | 139         | 89           | 67.42          | 39.04     |
| 35402         | SuM    | S168    | 43                   | 42          | 82           | 65.60          | 66.13     |
| 47367         | SuM    | S152    | 51                   | 139         | 114          | 69.09          | 45.06     |
| 35402         | RLi    | S144    | 7                    | 31          | 20           | 74.07          | 39.22     |
| 47367         | RLi    | S116    | 11                   | 45          | 22           | 66.67          | 32.84     |

| <b>Viaat</b> |        |         | absolute cell counts |            |              | % coexpressing |          |
|--------------|--------|---------|----------------------|------------|--------------|----------------|----------|
| animal       | area   | section | Tomato only          | Viaat only | coexpressing | of tomato      | of Viaat |
| 35402        | IF     | S138    | 16                   | 8          | 3            | 15.79          | 27.27    |
| 47367        | IF     | S101    | 18                   | 12         | 5            | 21.74          | 29.41    |
| 47367        | IF     | S113    | 11                   | 5          | 2            | 15.38          | 28.57    |
| 47319        | IF     | S113    | 11                   | 9          | 4            | 26.67          | 30.77    |
| 35402        | PBP    | S138    | 11                   | 111        | 5            | 31.25          | 4.31     |
| 47367        | PBP    | S101    | 26                   | 103        | 8            | 23.53          | 7.21     |
| 47367        | PBP    | S113    | 16                   | 110        | 3            | 15.79          | 2.65     |
| 47369        | PBP    | S101    | 8                    | NC         | 4            | 33.33          | NC       |
| 47369        | PBP    | S113    | 14                   | 87         | 8            | 36.36          | 8.42     |
| 47369        | szPBP  | S113    | 13                   | 13         | 1            | 7.14           | 7.14     |
| 47367        | szPBP  | S113    | 9                    | 12         | 1            | 10.00          | 7.69     |
| 47367        | szPBP  | S125    | 5                    | 7          | 1            | 16.67          | 12.50    |
| 35402        | PN/PIF | S138    | 21                   | 12         | 4            | 16.00          | 25.00    |
| 47367        | PN/PIF | S113    | 18                   | 12         | 5            | 21.74          | 29.41    |
| 47367        | rmVTA  | S149    | 100                  | 1          | 0            | 0.00           | 0.00     |
| 47319        | rmVTA  | S149    | 92                   | 9          | 2            | 2.13           | 18.18    |
| 47319        | SuM    | S149    | 95                   | 52         | 75           | 44.12          | 59.06    |
| 47367        | SuM    | S149    | 152                  | 65         | 69           | 31.22          | 51.49    |
| 35402        | RLi    | S138    | 21                   | 9          | 3            | 12.50          | 25.00    |
| 47367        | RLi    | S113    | 26                   | 9          | 3            | 10.34          | 25.00    |
